# Supplementary material for: Metabolic Obesity Phenotypes and Risk of Lung Cancer: A Prospective Cohort Study of 450,482 UK Biobank Participants
Source: MDPI journal article supplement (doi:10.3390/nu14163370), 2022-08-17
Supplement: s1 [file s1]

## **Supplementary to manuscript:**

### **Metabolic obesity phenotypes and risk of lung cancer: a prospective cohort study of 450,482 UK Biobank participants**

#### **Supplementary**

**Supplementary Table S1.** Criteria for metabolically healthy

**Supplementary Table S2.** Number of LC/non-LC samples after stratified by smoking status

**Supplementary Table S3.** Mutually adjusted association of BMI group and metabolic health group with lung cancer

**Supplementary Table S4.** Sensitivity analysis for the association between metabolic obesity phenotypes and LC risk

**Supplementary Table S5.** Two-sample MR with MR-Egger, weighted median, simple mode and weighted mode methods

**Supplementary Table S6.** Multi-stratum one-sample MR estimates for the relationship between metabolic obesity phenotypes and incident LC in never smokers

**Supplementary Table S7.** Multi-stratum one-sample MR estimates for the relationship between metabolic obesity phenotypes and incident LC in former smokers

**Supplementary Table S8.** Multi-stratum one-sample MR estimates for the relationship between metabolic obesity phenotypes and incident LC in current smokers

**Supplementary Figure S1.** Flowchart for participant selection

**Supplementary Figure S2.** Sex- and age-specific prevalence of metabolic obesity

phenotypes at baseline

**Supplementary Figure S3.** Stratification analysis by smoking status between metabolic obesity phenotypes and LC risk

**Supplementary Figure S4.** Stratification analysis by gender between metabolic obesity phenotypes and LC risk

**Supplementary Figure S5.** Stratification analysis by 60 years age between metabolic obesity phenotypes and LC risk

**Supplementary Table S1. Criteria for metabolically healthy**

| Biomarker           | Criteria for Metabolically Healthy                                 |
|---------------------|--------------------------------------------------------------------|
| BP                  | SBP <130 mmHg and DBP <80 mmHg and no antihypertensive medications |
| CRP                 | CRP <3 mg/L                                                        |
| Triacylglycerols    | Triacylglycerols <2.3 mmol/L                                       |
| LDL-C               | LDL-C <3 mmol/L and no cholesterol lowering medications            |
| HDL-C               | HDL-C >1 mmol/L                                                    |
| Glycated hemoglobin | HbA1c <42 mmol/mol (6%) and no diabetes medications                |

BP, Blood pressure; SBP, Systolic pressure; DBP, Diastolic pressure; CRP, C-reactive protein; LDL-C, Low-density lipoprotein cholesterol; HDL-C, High-density lipoprotein cholesterol.

**Supplementary Table S2.** Number of LC/non-LC samples after stratified by smoking status

|                              | Never smokers   |                         | Former smokers    |                         | Current smokers   |                        |
|------------------------------|-----------------|-------------------------|-------------------|-------------------------|-------------------|------------------------|
|                              | LC<br>(N = 499) | Non-LC<br>(N = 245,881) | LC<br>(N = 1,595) | Non-LC<br>(N = 151,190) | LC<br>(N = 1,518) | Non-LC<br>(N = 47,142) |
| Metabolic obesity phenotypes |                 |                         |                   |                         |                   |                        |
| MHUW                         | 60              | 27,013                  | 307               | 20,059                  | 286               | 7,388                  |
| MU UW                        | 0               | 32                      | 3                 | 10                      | 6                 | 32                     |
| MHN                          | 115             | 60,282                  | 198               | 28,969                  | 301               | 10,145                 |
| MUN                          | 43              | 18,414                  | 110               | 12,583                  | 71                | 2,697                  |
| MHOW                         | 107             | 55,233                  | 313               | 34,087                  | 172               | 8,416                  |
| MUOW                         | 0               | 1,015                   | 3                 | 355                     | 21                | 367                    |
| MHO                          | 25              | 8,649                   | 66                | 4,917                   | 176               | 3,040                  |
| MUO                          | 54              | 26,929                  | 300               | 21,368                  | 183               | 5,876                  |
| BMI groups                   |                 |                         |                   |                         |                   |                        |
| Underweight                  | 1               | 1,322                   | 10                | 453                     | 32                | 503                    |
| Normal                       | 173             | 85,548                  | 335               | 41,784                  | 596               | 16,244                 |
| Overweight                   | 200             | 101,440                 | 746               | 66,368                  | 556               | 19,373                 |
| Obesity                      | 122             | 56,264                  | 494               | 41,880                  | 311               | 10,612                 |
| Metabolic phenotypes         |                 |                         |                   |                         |                   |                        |
| Healthy                      | 266             | 135,364                 | 626               | 76,188                  | 569               | 21,717                 |
| Unhealthy                    | 140             | 62,945                  | 678               | 46,554                  | 662               | 16,431                 |

**Supplementary Table S3.** Mutually adjusted association of BMI groups and metabolic health groups with lung cancer

| Variable                | LC/Non-LC       | HR (95% CI) <sup>a</sup> | <i>P</i> value |
|-------------------------|-----------------|--------------------------|----------------|
| BMI categories          |                 |                          |                |
| Underweight             | 44 / 2,288      | 1.42 (0.87, 2.32)        | 0.16           |
| Normal                  | 1,113 / 144,124 | Reference                |                |
| Overweight              | 1,514 / 188,144 | 0.87 (0.77, 0.99)        | 0.04           |
| Obesity                 | 945 / 109,463   | 0.81 (0.70, 0.94)        | 0.005          |
| Metabolic health status |                 |                          |                |
| Healthy                 | 1,474 / 234,326 | Reference                |                |
| Unhealthy               | 1,495 / 126,672 | 1.17 (1.05, 1.31)        | 0.004          |

<sup>a</sup>The Cox proportional hazards regression model was adjusted for age, sex, education level, smoking status, family history of LC and personal history of emphysema/bronchitis.

**Supplementary Table S4.** Sensitivity analysis for the association between metabolic obesity phenotypes and LC risk

| Model | Evaluation method                                                                          | Characteristics              | HR (95%CI)         | P-value |
|-------|--------------------------------------------------------------------------------------------|------------------------------|--------------------|---------|
| 1     | Inclusion of incidence lung cancer to the first 1 year of follow-up                        | Metabolic obesity phenotypes |                    |         |
|       |                                                                                            | MHUW                         | 1.12 (0.63,2.00)   | 0.70    |
|       |                                                                                            | MUWU                         | 3.17 (1.30,7.68)   | 0.01    |
|       |                                                                                            | MHN                          | Reference          |         |
|       |                                                                                            | MUN                          | 1.06 (0.87,1.30)   | 0.57    |
|       |                                                                                            | MHOW                         | 0.82 (0.70,0.96)   | 0.01    |
|       |                                                                                            | MUOW                         | 1.01 (0.86,1.17)   | 0.94    |
|       |                                                                                            | MHO                          | 0.75 (0.60,0.94)   | 0.01    |
|       |                                                                                            | MUO                          | 0.92 (0.78,1.08)   | 0.29    |
|       |                                                                                            | Trend                        | 0.98 (0.95,1.00)   | 0.10    |
|       |                                                                                            | BMI groups                   |                    |         |
|       |                                                                                            | Underweight                  | 1.37 (0.89,2.13)   | 0.16    |
|       |                                                                                            | Normal                       | Reference          |         |
|       |                                                                                            | Overweight                   | 0.89 (0.79,0.99)   | 0.03    |
|       |                                                                                            | Obesity                      | 0.83 (0.73,0.94)   | 0.004   |
|       |                                                                                            | Trend                        | 0.90 (0.85,0.96)   | 0.001   |
|       |                                                                                            | Metabolic phenotypes         |                    |         |
|       |                                                                                            | Healthy                      | Reference          |         |
|       |                                                                                            | Unhealthy                    | 1.12 (1.01,1.24)   | 0.03    |
| 2     | Additional adjustment for family history of any cancer and drinking status                 | Metabolic obesity phenotypes |                    |         |
|       |                                                                                            | MHUW                         | 1.04 (0.49,2.22)   | 0.92    |
|       |                                                                                            | MUWU                         | 1.32 (0.18,9.49)   | 0.78    |
|       |                                                                                            | MHN                          | Reference          |         |
|       |                                                                                            | MUN                          | 1.00 (0.76,1.31)   | 0.98    |
|       |                                                                                            | MHOW                         | 0.88 (0.72,1.08)   | 0.24    |
|       |                                                                                            | MUOW                         | 0.96 (0.78,1.18)   | 0.70    |
|       |                                                                                            | MHO                          | 0.69 (0.51,0.93)   | 0.02    |
|       |                                                                                            | MUO                          | 0.87 (0.71,1.08)   | 0.21    |
|       |                                                                                            | Trend                        | 0.97 (0.93,1.00)   | 0.08    |
|       |                                                                                            | BMI groups                   |                    |         |
|       |                                                                                            | Underweight                  | 0.97 (0.50,1.88)   | 0.92    |
|       |                                                                                            | Normal                       | Reference          |         |
|       |                                                                                            | Overweight                   | 0.88 (0.76,1.01)   | 0.08    |
|       |                                                                                            | Obesity                      | 0.81 (0.69,0.95)   | 0.01    |
|       |                                                                                            | Trend                        | 0.90 (0.83,0.98)   | 0.01    |
|       |                                                                                            | Metabolic phenotypes         |                    |         |
|       |                                                                                            | Healthy                      | Reference          |         |
|       |                                                                                            | Unhealthy                    | 1.05 (0.92,1.20)   | 0.47    |
| 3     | Additional adjustment for age at first smoking, number of cigarettes smoked daily, package | Metabolic obesity phenotypes |                    |         |
|       |                                                                                            | MHUW                         | 1.47 (0.47,4.64)   | 0.51    |
|       |                                                                                            | MUWU                         | 11.49 (2.81,46.96) | 0.001   |
|       |                                                                                            | MHN                          | Reference          |         |
|       |                                                                                            | MUN                          | 0.98 (0.67,1.43)   | 0.90    |

|   |                                                    |                              |                  |       |
|---|----------------------------------------------------|------------------------------|------------------|-------|
|   | year, time since last smoking (in former smokers)  | MHOW                         | 1.00 (0.79,1.26) | 0.98  |
|   |                                                    | MUOW                         | 1.10 (0.86,1.40) | 0.46  |
|   |                                                    | MHO                          | 0.68 (0.49,0.94) | 0.02  |
|   |                                                    | MUO                          | 0.93 (0.73,1.19) | 0.58  |
|   |                                                    | Trend                        | 0.97 (0.93,1.01) | 0.14  |
|   |                                                    | BMI groups                   |                  |       |
|   |                                                    | Underweight                  | 2.35 (1.04,5.32) | 0.04  |
|   |                                                    | Normal                       | Reference        |       |
|   |                                                    | Overweight                   | 1.02 (0.85,1.21) | 0.87  |
|   |                                                    | Obesity                      | 0.82 (0.68,0.99) | 0.04  |
|   |                                                    | Trend                        | 0.88 (0.81,0.97) | 0.008 |
|   |                                                    | Metabolic phenotypes         |                  |       |
|   |                                                    | Healthy                      | Reference        |       |
|   |                                                    | Unhealthy                    | 1.09 (0.94,1.26) | 0.26  |
| 4 | Exclusion of participants that were former smokers | Metabolic obesity phenotypes |                  |       |
|   |                                                    | MHUW                         | 1.03 (0.52,2.01) | 0.94  |
|   |                                                    | MU UW                        | 2.12 (0.68,6.67) | 0.20  |
|   |                                                    | MHN                          | Reference        |       |
|   |                                                    | MUN                          | 1.01 (0.79,1.30) | 0.93  |
|   |                                                    | MHOW                         | 0.69 (0.55,0.87) | 0.002 |
|   |                                                    | MUOW                         | 0.90 (0.73,1.11) | 0.31  |
|   |                                                    | MHO                          | 0.92 (0.66,1.28) | 0.62  |
|   |                                                    | MUO                          | 0.81 (0.64,1.03) | 0.09  |
|   |                                                    | Trend                        | 0.96 (0.92,1.00) | 0.06  |
|   |                                                    | BMI groups                   |                  |       |
|   |                                                    | Underweight                  | 1.11 (0.65,1.91) | 0.70  |
|   |                                                    | Normal                       | Reference        |       |
|   |                                                    | Overweight                   | 0.79 (0.68,0.92) | 0.002 |
|   |                                                    | Obesity                      | 0.82 (0.68,0.98) | 0.03  |
|   |                                                    | Trend                        | 0.89 (0.81,0.97) | 0.006 |
|   |                                                    | Metabolic phenotypes         |                  |       |
|   |                                                    | Healthy                      | Reference        |       |
|   |                                                    | Unhealthy                    | 1.04 (0.90,1.20) | 0.61  |
| 5 | Exclusion of participants that were non-Europeans  | Metabolic obesity phenotypes |                  |       |
|   |                                                    | MHUW                         | 1.03 (0.55,1.94) | 0.93  |
|   |                                                    | MU UW                        | 2.90 (1.08,7.81) | 0.04  |
|   |                                                    | MHN                          | Reference        |       |
|   |                                                    | MUN                          | 1.07 (0.87,1.33) | 0.52  |
|   |                                                    | MHOW                         | 0.84 (0.71,1.00) | 0.05  |
|   |                                                    | MUOW                         | 1.02 (0.87,1.21) | 0.77  |
|   |                                                    | MHO                          | 0.81 (0.64,1.02) | 0.07  |
|   |                                                    | MUO                          | 0.96 (0.81,1.14) | 0.62  |
|   |                                                    | Trend                        | 0.99 (0.96,1.02) | 0.38  |
|   |                                                    | BMI groups                   |                  |       |
|   |                                                    | Underweight                  | 1.24 (0.76,2.01) | 0.39  |
|   |                                                    | Normal                       | Reference        |       |

|   |                                                                                                                                     |                              |                  |       |
|---|-------------------------------------------------------------------------------------------------------------------------------------|------------------------------|------------------|-------|
|   |                                                                                                                                     | Overweight                   | 0.92 (0.81,1.03) | 0.14  |
|   |                                                                                                                                     | Obesity                      | 0.88 (0.78,1.01) | 0.07  |
|   |                                                                                                                                     | Trend                        | 0.94 (0.88,1.00) | 0.04  |
|   |                                                                                                                                     | Metabolic phenotypes         |                  |       |
|   |                                                                                                                                     | Healthy                      | Reference        |       |
|   |                                                                                                                                     | Unhealthy                    | 1.12 (1.01,1.25) | 0.03  |
| 6 | Exclusion of participants with missing covariates                                                                                   | Metabolic obesity phenotypes |                  |       |
|   |                                                                                                                                     | MHUW                         | 1.14 (0.64,2.03) | 0.66  |
|   |                                                                                                                                     | MU UW                        | 3.24 (1.33,7.87) | 0.009 |
|   |                                                                                                                                     | MHN                          | Reference        |       |
|   |                                                                                                                                     | MUN                          | 1.04 (0.85,1.28) | 0.72  |
|   |                                                                                                                                     | MHOW                         | 0.82 (0.70,0.96) | 0.02  |
|   |                                                                                                                                     | MUOW                         | 1.00 (0.86,1.17) | 0.97  |
|   |                                                                                                                                     | MHO                          | 0.76 (0.61,0.95) | 0.02  |
|   |                                                                                                                                     | MUO                          | 0.92 (0.78,1.08) | 0.33  |
|   |                                                                                                                                     | Trend                        | 0.98 (0.95,1.01) | 0.13  |
|   |                                                                                                                                     | BMI groups                   |                  |       |
|   |                                                                                                                                     | Underweight                  | 1.40 (0.90,2.17) | 0.13  |
|   |                                                                                                                                     | Normal                       | Reference        |       |
|   |                                                                                                                                     | Overweight                   | 0.89 (0.80,0.99) | 0.04  |
|   |                                                                                                                                     | Obesity                      | 0.84 (0.74,0.96) | 0.009 |
|   |                                                                                                                                     | Trend                        | 0.91 (0.86,0.97) | 0.003 |
|   |                                                                                                                                     | Metabolic phenotypes         |                  |       |
|   |                                                                                                                                     | Healthy                      | Reference        |       |
|   |                                                                                                                                     | Unhealthy                    | 1.11 (1.00,1.23) | 0.04  |
| 7 | Additional adjustment for dietary patterns (red and processed meat intake, fruit and vegetable intake) and physical activity (IPAQ) | Metabolic obesity phenotypes |                  |       |
|   |                                                                                                                                     | MHUW                         | 0.93 (0.44,1.98) | 0.85  |
|   |                                                                                                                                     | MU UW                        | 3.07 (0.98,9.65) | 0.06  |
|   |                                                                                                                                     | MHN                          | Reference        |       |
|   |                                                                                                                                     | MUN                          | 1.08 (0.86,1.36) | 0.51  |
|   |                                                                                                                                     | MHOW                         | 0.81 (0.67,0.97) | 0.03  |
|   |                                                                                                                                     | MUOW                         | 1.01 (0.85,1.21) | 0.90  |
|   |                                                                                                                                     | MHO                          | 0.77 (0.59,1.00) | 0.047 |
|   |                                                                                                                                     | MUO                          | 0.88 (0.72,1.06) | 0.18  |
|   |                                                                                                                                     | Trend1                       | 0.97 (0.94,1.01) | 0.10  |
|   |                                                                                                                                     | Trend2                       | 1.01 (0.98,1.04) | 0.48  |
|   |                                                                                                                                     | BMI groups                   |                  |       |
|   |                                                                                                                                     | Underweight                  | 1.25 (0.72,2.18) | 0.43  |
|   |                                                                                                                                     | Normal                       | Reference        |       |
|   |                                                                                                                                     | Overweight                   | 0.89 (0.78,1.01) | 0.07  |
|   |                                                                                                                                     | Obesity                      | 0.81 (0.70,0.94) | 0.005 |
|   |                                                                                                                                     | Trend                        | 0.90 (0.83,0.96) | 0.003 |
|   |                                                                                                                                     | Metabolic phenotypes         |                  |       |
|   |                                                                                                                                     | Healthy                      | Reference        |       |
|   |                                                                                                                                     | Unhealthy                    | 1.11 (0.99,1.25) | 0.08  |
| 8 | Additional                                                                                                                          | Metabolic obesity phenotypes |                  |       |



|                                         |              |                      |                  |                      |
|-----------------------------------------|--------------|----------------------|------------------|----------------------|
| adjustment<br>waist hip<br>(continuous) | for<br>ratio | MHUW                 | 1.23 (0.69,2.19) | 0.49                 |
|                                         |              | MU UW                | 3.48 (1.43,8.46) | 0.006                |
|                                         |              | MHN                  | Reference        |                      |
|                                         |              | MUN                  | 1.00 (0.81,1.23) | 0.98                 |
|                                         |              | MHOW                 | 0.77 (0.65,0.91) | 0.002                |
|                                         |              | MUOW                 | 0.90 (0.77,1.07) | 0.23                 |
|                                         |              | MHO                  | 0.67 (0.53,0.85) | 0.001                |
|                                         |              | MUO                  | 0.79 (0.65,0.95) | 0.01                 |
|                                         |              | Trend1               | 0.95 (0.91,0.98) | 0.002                |
|                                         |              | Trend2               | 1.00 (0.98,1.02) | 0.98                 |
|                                         |              | BMI groups           |                  |                      |
|                                         |              | Underweight          | 1.54 (0.99,2.39) | 0.05                 |
|                                         |              | Normal               | Reference        |                      |
|                                         |              | Overweight           | 0.82 (0.73,0.92) | 0.001                |
|                                         |              | Obesity              | 0.72 (0.63,0.84) | $9.7 \times 10^{-6}$ |
|                                         |              | Trend                | 0.84 (0.79,0.90) | $2.0 \times 10^{-6}$ |
|                                         |              | Metabolic phenotypes |                  |                      |
|                                         |              | Healthy              | Reference        |                      |
|                                         |              | Unhealthy            | 1.07 (0.96,1.20) | 0.19                 |

---

**Supplementary Table S5.** Two-sample MR with MR-Egger, weighted median, simple mode and weighted mode methods

|                              | Method          | No.SNPs | OR (95%CI)       | P-value |
|------------------------------|-----------------|---------|------------------|---------|
| Metabolic obesity phenotypes |                 |         |                  |         |
| MHUW                         | MR Egger        | 10      | 0.90 (0.67,1.23) | 0.54    |
| MHUW                         | Weighted median | 10      | 1.12 (0.99,1.27) | 0.08    |
| MHUW                         | Simple mode     | 10      | 1.17 (0.95,1.45) | 0.17    |
| MHUW                         | Weighted mode   | 10      | 1.13 (0.94,1.35) | 0.22    |
| MU UW                        | MR Egger        | 35      | 0.96 (0.88,1.04) | 0.30    |
| MU UW                        | Weighted median | 35      | 0.99 (0.97,1.01) | 0.50    |
| MU UW                        | Simple mode     | 35      | 1.00 (0.96,1.05) | 0.97    |
| MU UW                        | Weighted mode   | 35      | 1.00 (0.96,1.04) | 0.97    |
| MHN                          |                 |         | Reference        |         |
| MUN                          | MR Egger        | 14      | 1.12 (0.87,1.43) | 0.41    |
| MUN                          | Weighted median | 14      | 1.02 (0.91,1.15) | 0.75    |
| MUN                          | Simple mode     | 14      | 1.00 (0.83,1.22) | 0.96    |
| MUN                          | Weighted mode   | 14      | 1.05 (0.93,1.18) | 0.42    |
| MHOW                         | MR Egger        | 16      | 1.39 (0.48,4.01) | 0.55    |
| MHOW                         | Weighted median | 16      | 1.23 (0.92,1.64) | 0.16    |
| MHOW                         | Simple mode     | 16      | 1.64 (0.91,2.96) | 0.12    |
| MHOW                         | Weighted mode   | 16      | 1.35 (0.84,2.18) | 0.24    |
| MUOW                         | MR Egger        | 46      | 1.11 (0.90,1.38) | 0.33    |
| MUOW                         | Weighted median | 46      | 1.02 (0.90,1.15) | 0.81    |
| MUOW                         | Simple mode     | 46      | 1.07 (0.84,1.38) | 0.57    |
| MUOW                         | Weighted mode   | 46      | 1.06 (0.92,1.24) | 0.43    |
| MHO                          | MR Egger        | 97      | 1.03 (0.85,1.25) | 0.76    |
| MHO                          | Weighted median | 97      | 1.04 (0.95,1.14) | 0.36    |
| MHO                          | Simple mode     | 97      | 1.04 (0.84,1.29) | 0.74    |
| MHO                          | Weighted mode   | 97      | 1.02 (0.87,1.18) | 0.84    |
| MUO                          | MR Egger        | 190     | 1.01 (0.85,1.21) | 0.90    |
| MUO                          | Weighted median | 190     | 1.09 (1.01,1.18) | 0.02    |
| MUO                          | Simple mode     | 190     | 1.06 (0.85,1.33) | 0.60    |
| MUO                          | Weighted mode   | 190     | 1.05 (0.89,1.23) | 0.57    |
| MHO Trend1                   | MR Egger        | 294     | 1.01 (0.79,1.31) | 0.91    |
| MHO Trend1                   | Weighted median | 294     | 1.16 (1.03,1.31) | 0.02    |
| MHO Trend1                   | Simple mode     | 294     | 1.09 (0.73,1.62) | 0.68    |
| MHO Trend1                   | Weighted mode   | 294     | 1.06 (0.82,1.37) | 0.65    |
| MHO Trend2                   | MR Egger        | 154     | 0.99 (0.82,1.19) | 0.89    |
| MHO Trend2                   | Weighted median | 154     | 1.08 (0.97,1.22) | 0.16    |
| MHO Trend2                   | Simple mode     | 154     | 1.13 (0.86,1.48) | 0.39    |
| MHO Trend2                   | Weighted mode   | 154     | 1.08 (0.94,1.24) | 0.28    |
| BMI groups                   |                 |         |                  |         |
| Underweight                  | MR Egger        | 6       | 1.05 (0.81,1.36) | 0.74    |
| Underweight                  | Weighted median | 6       | 0.95 (0.81,1.11) | 0.49    |
| Underweight                  | Simple mode     | 6       | 0.92 (0.73,1.16) | 0.49    |
| Underweight                  | Weighted mode   | 6       | 0.91 (0.73,1.14) | 0.45    |
| Normal                       |                 |         | Reference        |         |
| Overweight                   | MR Egger        | 38      | 0.95 (0.46,1.94) | 0.88    |

|                      |                 |     |                  |      |
|----------------------|-----------------|-----|------------------|------|
| Overweight           | Weighted median | 38  | 1.04 (0.81,1.34) | 0.76 |
| Overweight           | Simple mode     | 38  | 1.27 (0.75,2.15) | 0.38 |
| Overweight           | Weighted mode   | 38  | 1.02 (0.68,1.53) | 0.92 |
| Obesity              | MR Egger        | 422 | 1.00 (0.87,1.16) | 0.98 |
| Obesity              | Weighted median | 422 | 1.07 (1.00,1.15) | 0.05 |
| Obesity              | Simple mode     | 422 | 1.03 (0.81,1.30) | 0.81 |
| Obesity              | Weighted mode   | 422 | 1.03 (0.89,1.19) | 0.70 |
| BMI Trend            | MR Egger        | 440 | 1.02 (0.61,1.70) | 0.95 |
| BMI Trend            | Weighted median | 440 | 1.21 (0.95,1.53) | 0.12 |
| BMI Trend            | Simple mode     | 440 | 0.92 (0.40,2.12) | 0.84 |
| BMI Trend            | Weighted mode   | 440 | 0.98 (0.56,1.70) | 0.93 |
| Metabolic phenotypes |                 |     |                  |      |
| Healthy              |                 |     | Reference        |      |
| Unhealthy            | MR Egger        | 108 | 1.00 (0.85,1.18) | 0.99 |
| Unhealthy            | Weighted median | 108 | 1.03 (0.91,1.16) | 0.61 |
| Unhealthy            | Simple mode     | 108 | 1.15 (0.89,1.48) | 0.30 |
| Unhealthy            | Weighted mode   | 108 | 1.07 (0.96,1.20) | 0.23 |

---

**Supplementary Table S6.** Multi-stratum one-sample MR estimates for the relationship between metabolic obesity phenotypes and incident LC in never smokers

|                                           | No.SNPs <sup>b</sup> | F-statistics | OR (95%CI)       | P-value |
|-------------------------------------------|----------------------|--------------|------------------|---------|
| Metabolic obesity phenotypes <sup>a</sup> |                      |              |                  |         |
| MHUW                                      | 15                   | 133          | 1.02 (0.98,1.06) | 0.40    |
| MU UW                                     | 67                   | 710          | 1.05 (0.93,1.18) | 0.46    |
| MHN                                       |                      |              | Reference        |         |
| MUN                                       | 13                   | 275          | 1.00 (0.99,1.01) | 0.57    |
| MHOW                                      | 6                    | 53           | 0.99 (0.98,1.00) | 0.07    |
| MUOW                                      | 19                   | 320          | 1.00 (0.99,1.00) | 0.24    |
| MHO                                       | 39                   | 465          | 1.00 (0.99,1.00) | 0.35    |
| MUO                                       | 63                   | 686          | 1.00 (1.00,1.01) | 0.46    |
| Trend1                                    | 126                  | 624          | 1.00 (1.00,1.00) | 0.14    |
| Trend2                                    | 51                   | 358          | 1.00 (1.00,1.00) | 0.48    |
| BMI groups                                |                      |              |                  |         |
| Underweight                               | 17                   | 98           | 1.02 (0.98,1.06) | 0.36    |
| Normal                                    |                      |              | Reference        |         |
| Overweight                                | 11                   | 45           | 1.00 (0.99,1.00) | 0.35    |
| Obesity                                   | 163                  | 571          | 1.00 (1.00,1.00) | 0.89    |
| Trend                                     | 178                  | 691          | 1.00 (1.00,1.00) | 0.45    |
| Metabolic phenotypes                      |                      |              |                  |         |
| Healthy                                   |                      |              | Reference        |         |
| Unhealthy                                 | 46                   | 418          | 1.00 (1.00,1.00) | 0.45    |

<sup>a</sup>Metabolic obesity phenotypes orders include metabolically healthy normal (MHN)/metabolically healthy overweight (MHOW)/metabolically healthy obesity (MHO)/metabolically unhealthy normal (MUN)/metabolically unhealthy overweight (MUOW)/metabolically unhealthy obesity (MUO) (marked as 1) and MHN/MUN/MHOW/MUOW/MHO/MUO (marked as 2);

<sup>b</sup>Number of SNPs after LD control, harmonizing process and removing outliers; we relaxed the instrument *P*-value threshold ( $P < 5 \times 10^{-6}$ ) for MHUW, MU UW, underweight groups; SNP, Single nucleotide polymorphism; OR, Odds ratio.

**Supplementary Table S7.** Multi-stratum one-sample MR estimates for the relationship between metabolic obesity phenotypes and incident LC in former smokers

|                                           | No.SNPs <sup>b</sup> | F-statistics | OR (95%CI)       | P-value |
|-------------------------------------------|----------------------|--------------|------------------|---------|
| Metabolic obesity phenotypes <sup>a</sup> |                      |              |                  |         |
| MHUW                                      | 25                   | 209          | 1.01 (0.94,1.07) | 0.84    |
| MU UW                                     | 78                   | 1169         | 0.99 (0.83,1.18) | 0.89    |
| MHN                                       |                      |              | Reference        |         |
| MUN                                       | 16                   | 129          | 1.01 (0.98,1.03) | 0.47    |
| MHOW                                      | 21                   | 74           | 0.99 (0.98,1.01) | 0.55    |
| MUOW                                      | 8                    | 83           | 0.99 (0.97,1.01) | 0.43    |
| MHO                                       | 16                   | 172          | 1.00 (0.99,1.02) | 0.49    |
| MUO                                       | 28                   | 289          | 1.00 (0.99,1.01) | 0.98    |
| Trend1                                    | 46                   | 154          | 1.00 (1.00,1.00) | 0.78    |
| Trend2                                    | 20                   | 106          | 1.00 (1.00,1.00) | 0.99    |
| BMI groups                                |                      |              |                  |         |
| Underweight                               | 20                   | 98           | 1.00 (0.91,1.09) | 0.98    |
| Normal                                    |                      |              | Reference        |         |
| Overweight                                | 37                   | 70           | 1.01 (0.99,1.02) | 0.50    |
| Obesity                                   | 68                   | 381          | 1.00 (0.99,1.01) | 0.89    |
| Trend                                     | 74                   | 240          | 1.00 (0.99,1.00) | 0.70    |
| Metabolic phenotypes                      |                      |              |                  |         |
| Healthy                                   |                      |              | Reference        |         |
| Unhealthy                                 | 22                   | 132          | 1.00 (0.99,1.01) | 0.79    |

<sup>a</sup>Metabolic obesity phenotypes orders include metabolically healthy normal (MHN)/metabolically healthy overweight (MHOW)/metabolically healthy obesity (MHO)/metabolically unhealthy normal (MUN)/metabolically unhealthy overweight (MUOW)/metabolically unhealthy obesity (MUO) (marked as 1) and MHN/MUN/MHOW/MUOW/MHO/MUO (marked as 2);

<sup>b</sup>Number of SNPs after LD control, harmonizing process and removing outliers; we relaxed the instrument *P*-value threshold ( $P < 5 \times 10^{-6}$ ) for MHUW, MU UW, MUN, MHOW, underweight, overweight groups;

SNP, Single nucleotide polymorphism; OR, Odds ratio.

**Supplementary Table S8.** Multi-stratum one-sample MR estimates for the relationship between metabolic obesity phenotypes and incident LC in current smokers

|                                           | No.SNPs <sup>b</sup> | F-statistics | OR (95%CI)       | P-value |
|-------------------------------------------|----------------------|--------------|------------------|---------|
| Metabolic obesity phenotypes <sup>a</sup> |                      |              |                  |         |
| MHUW                                      | 16                   | 337          | 1.06 (0.96,1.18) | 0.22    |
| MU UW                                     | 69                   | 1179         | 1.14 (0.95,1.38) | 0.16    |
| MHN                                       |                      |              | Reference        |         |
| MUN                                       | 10                   | 190          | 1.03 (0.97,1.09) | 0.34    |
| MHOW                                      | 20                   | 259          | 0.98 (0.95,1.01) | 0.28    |
| MUOW                                      | 16                   | 213          | 0.99 (0.95,1.03) | 0.77    |
| MHO                                       | 7                    | 145          | 1.00 (0.94,1.07) | 0.89    |
| MUO                                       | 5                    | 143          | 0.97 (0.92,1.02) | 0.21    |
| Trend1                                    | 6                    | 84           | 1.00 (0.99,1.01) | 0.46    |
| Trend2                                    | 8                    | 105          | 0.99 (0.98,1.00) | 0.04    |
| BMI groups                                |                      |              |                  |         |
| Underweight                               | 18                   | 281          | 1.06 (0.94,1.18) | 0.35    |
| Normal                                    |                      |              | Reference        |         |
| Overweight                                | 19                   | 124          | 1.01 (0.98,1.05) | 0.54    |
| Obesity                                   | 10                   | 182          | 0.98 (0.94,1.01) | 0.17    |
| Trend                                     | 7                    | 114          | 0.97 (0.95,0.99) | 0.007   |
| Metabolic phenotypes                      |                      |              |                  |         |
| Healthy                                   |                      |              | Reference        |         |
| Unhealthy                                 | 9                    | 128          | 0.97 (0.94,1.01) | 0.12    |

<sup>a</sup>Metabolic obesity phenotypes orders include metabolically healthy normal (MHN)/metabolically healthy overweight (MHOW)/metabolically healthy obesity (MHO)/metabolically unhealthy normal (MUN)/metabolically unhealthy overweight (MUOW)/metabolically unhealthy obesity (MUO) (marked as 1) and MHN/MUN/MHOW/MUOW/MHO/MUO (marked as 2);

<sup>b</sup>Number of SNPs after LD control, harmonizing process and removing outliers; we relaxed the instrument *P*-value threshold ( $P < 5 \times 10^{-6}$ ) for MHUW, MU UW, MUN, MHOW, underweight, overweight groups;

SNP, Single nucleotide polymorphism; OR, Odds ratio.

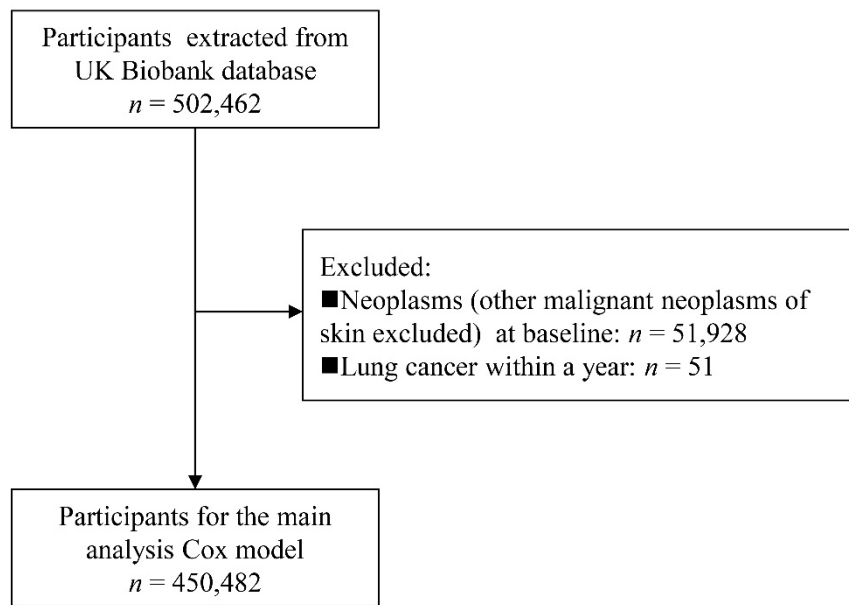

**Supplementary Figure S1.** Flowchart for participant selection

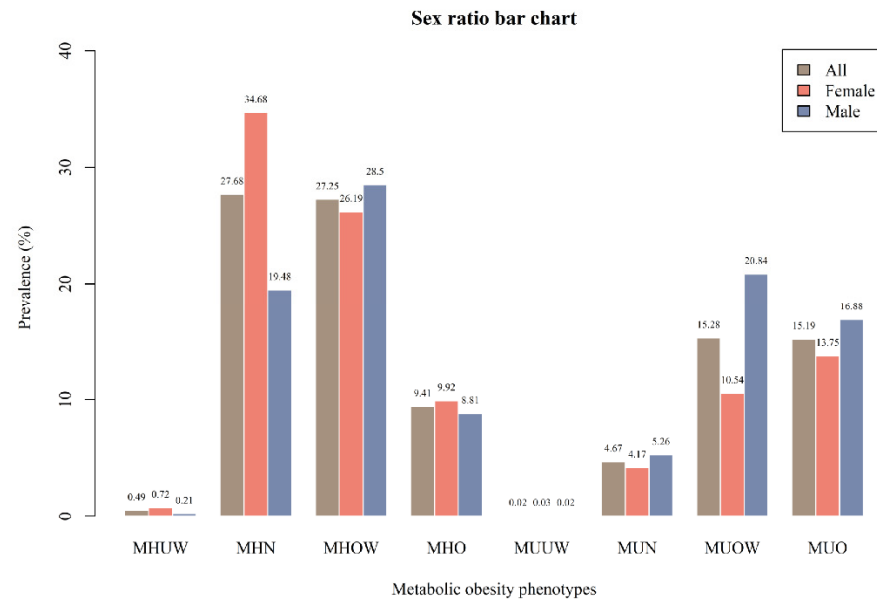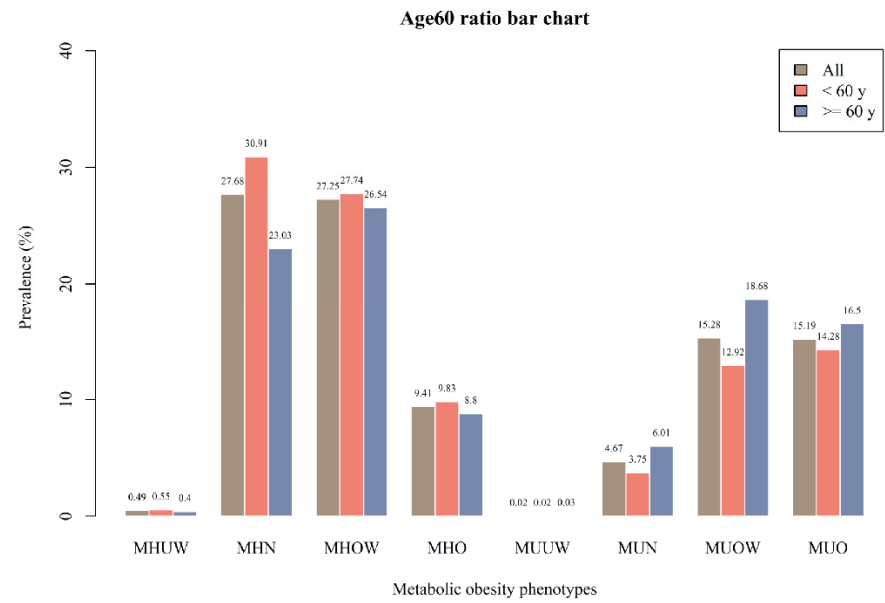

**Supplementary Figure S2.** Sex- and age-specific prevalence of metabolic obesity phenotypes at baseline



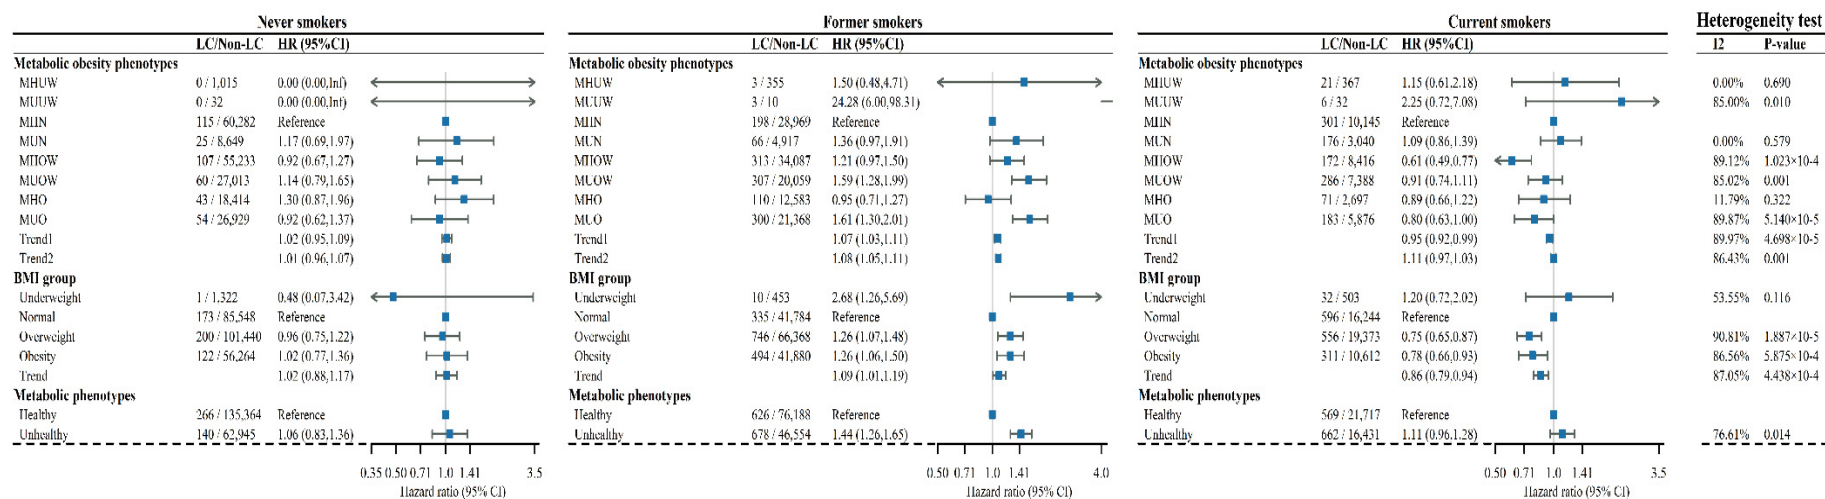

**Supplementary Figure S3.** Stratification analysis by smoking status between metabolic obesity phenotypes and LC risk

HRs: hazard ratios; LC: lung cancer; BMI, body mass index; MHUW, metabolically healthy underweight; MHN, metabolically healthy normal; MHO, metabolically healthy obesity; MHOW, metabolically healthy overweight; MUUW, metabolically unhealthy underweight; MUN, metabolically unhealthy normal; MUO, metabolically unhealthy obesity; MUOW, metabolically unhealthy overweight.

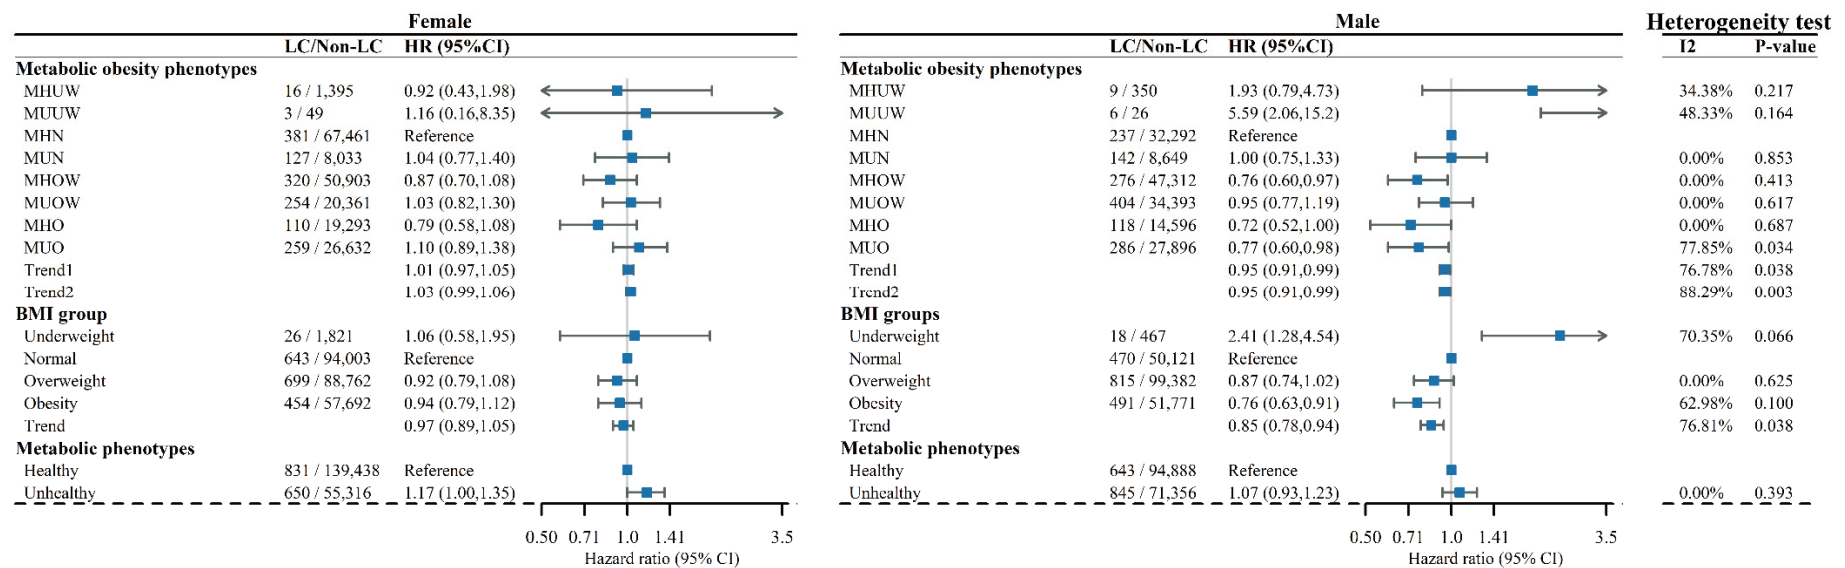

**Supplementary Figure S4.** Stratification analysis by gender between metabolic obesity phenotypes and LC risk

HRs: hazard ratios; LC: lung cancer; BMI, body mass index; MHUW, metabolically healthy underweight; MHN, metabolically healthy normal; MHO, metabolically healthy obesity; MHOW, metabolically healthy overweight; MUOW, metabolically unhealthy underweight; MUN, metabolically unhealthy normal; MUO, metabolically unhealthy obesity; MUOW, metabolically unhealthy overweight.

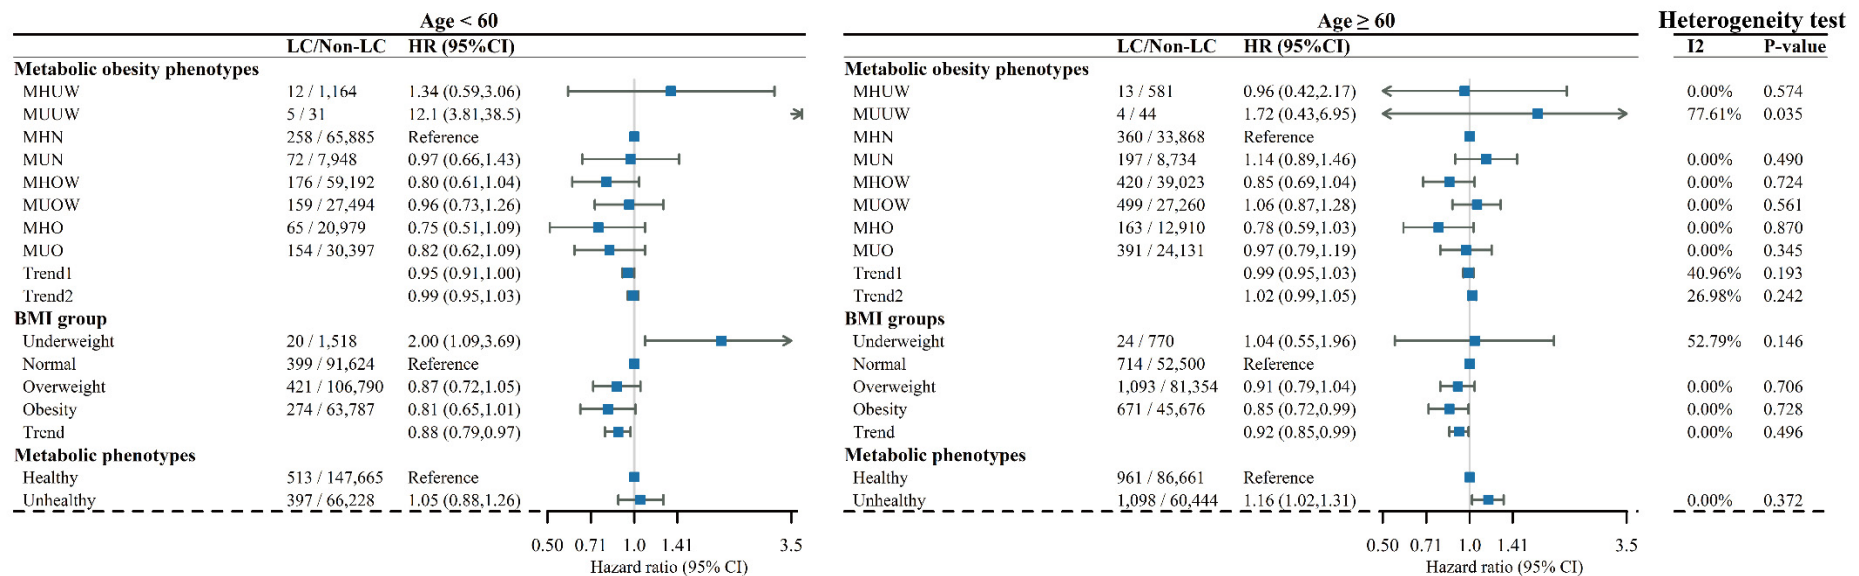

**Supplementary Figure S5.** Stratification analysis by 60 years age between metabolic obesity phenotypes and LC risk

HRs: hazard ratios; LC: lung cancer; BMI, body mass index; MHUW, metabolically healthy underweight; MHN, metabolically healthy normal; MHO, metabolically healthy obesity; MHOW, metabolically healthy overweight; MUUW, metabolically unhealthy underweight; MUN, metabolically unhealthy normal; MUO, metabolically unhealthy obesity; MUOW, metabolically unhealthy overweight.
